# Supplementary material
Source: PubMed Central journal article supplement (PMC6579630)

Supplementary Figure 1

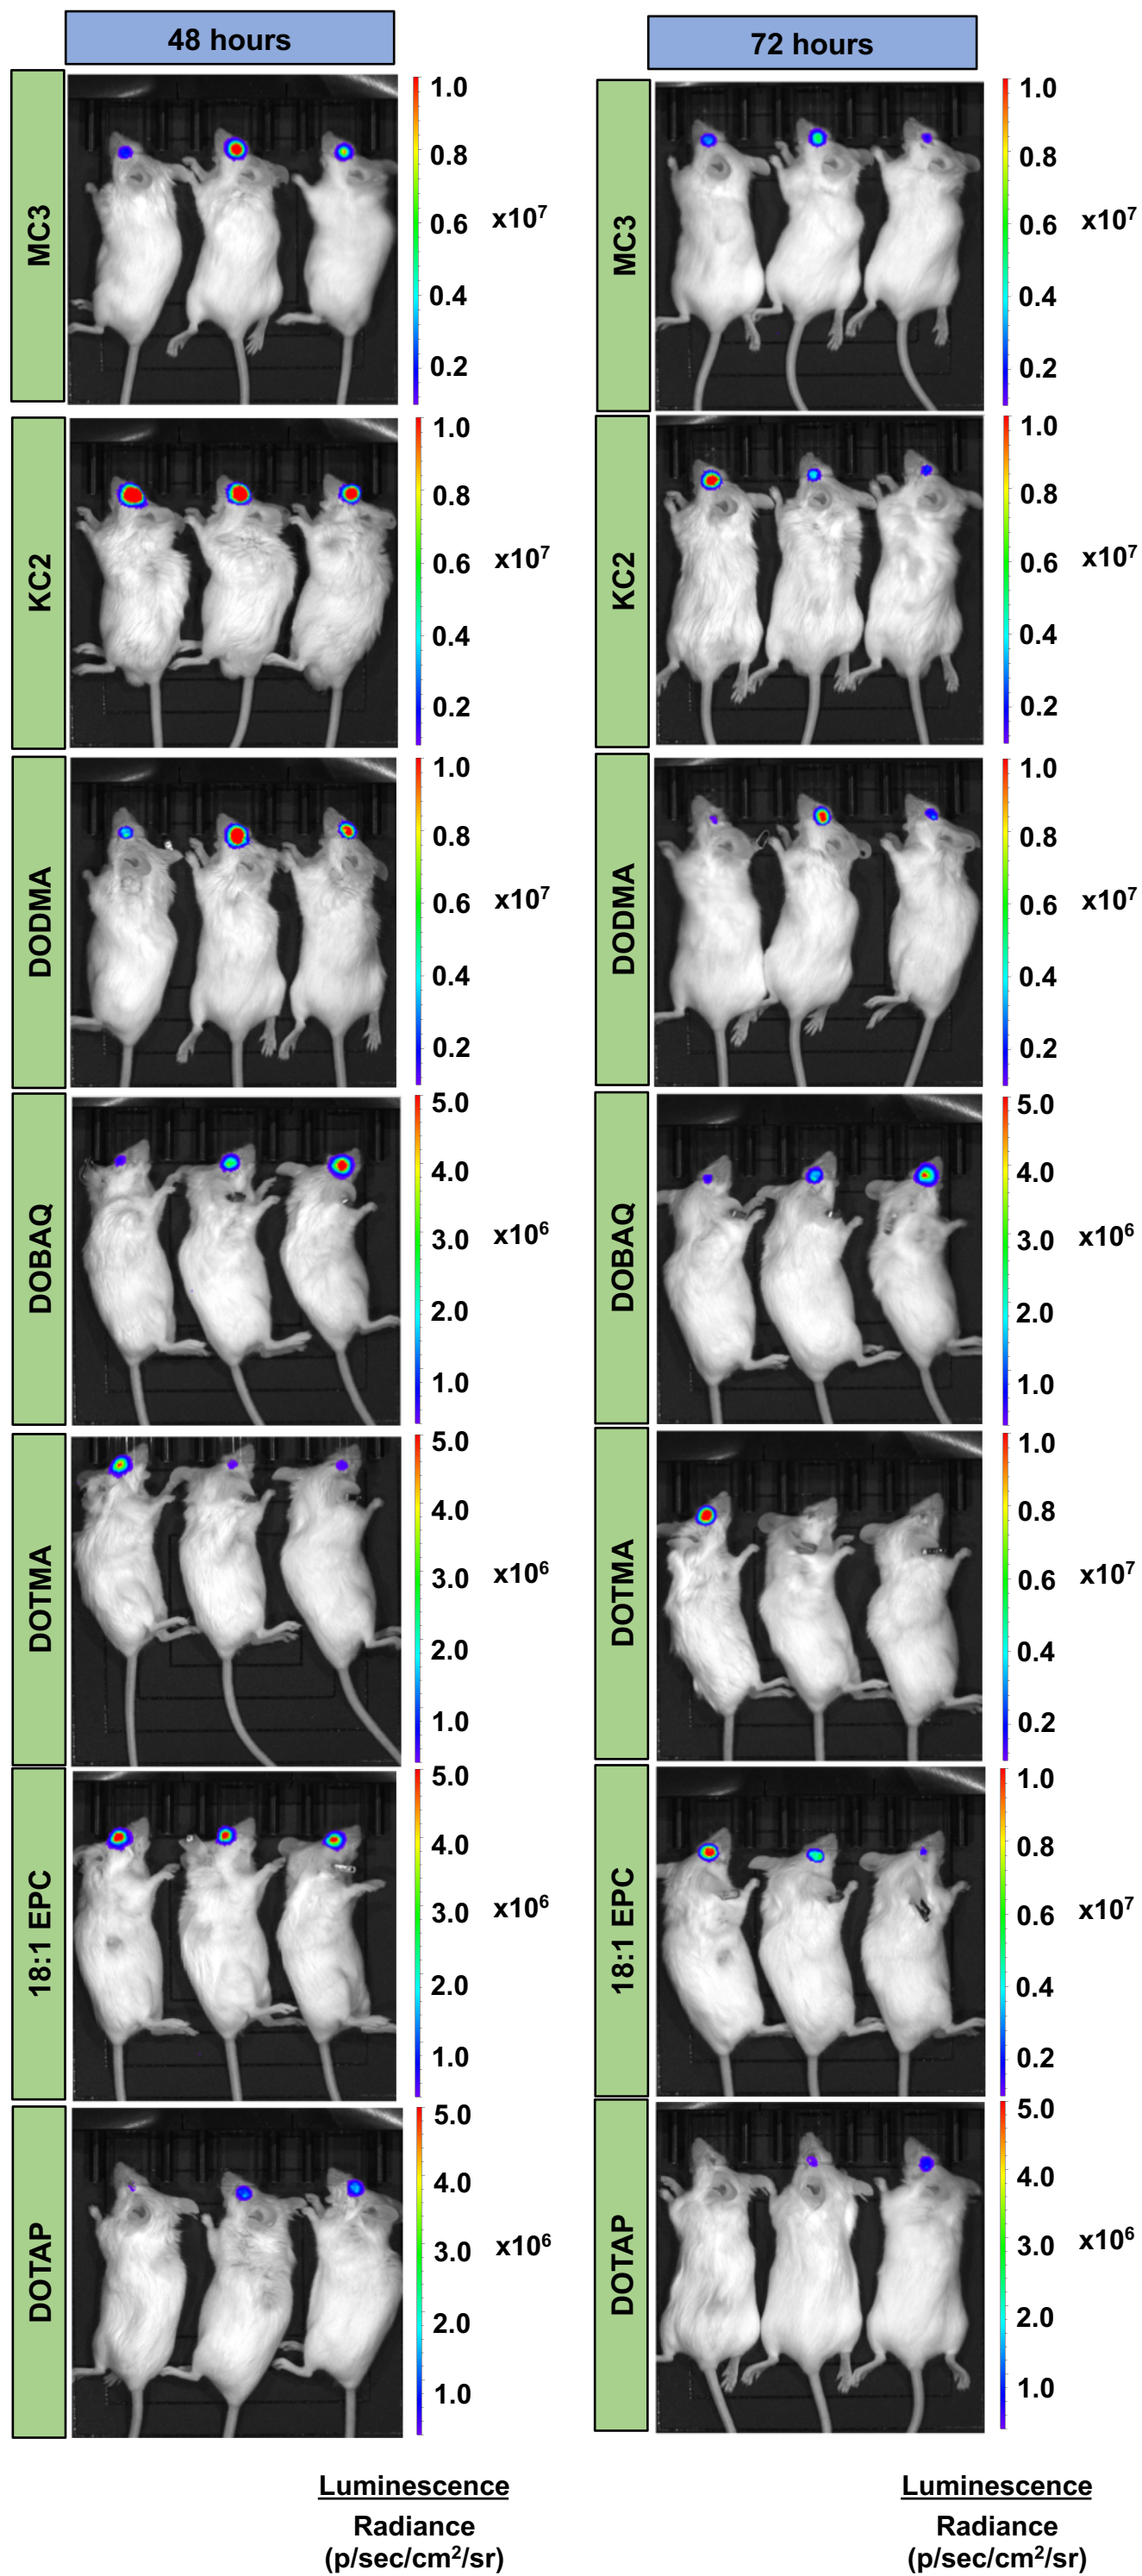

Supplementary Figure 1 (Continued)

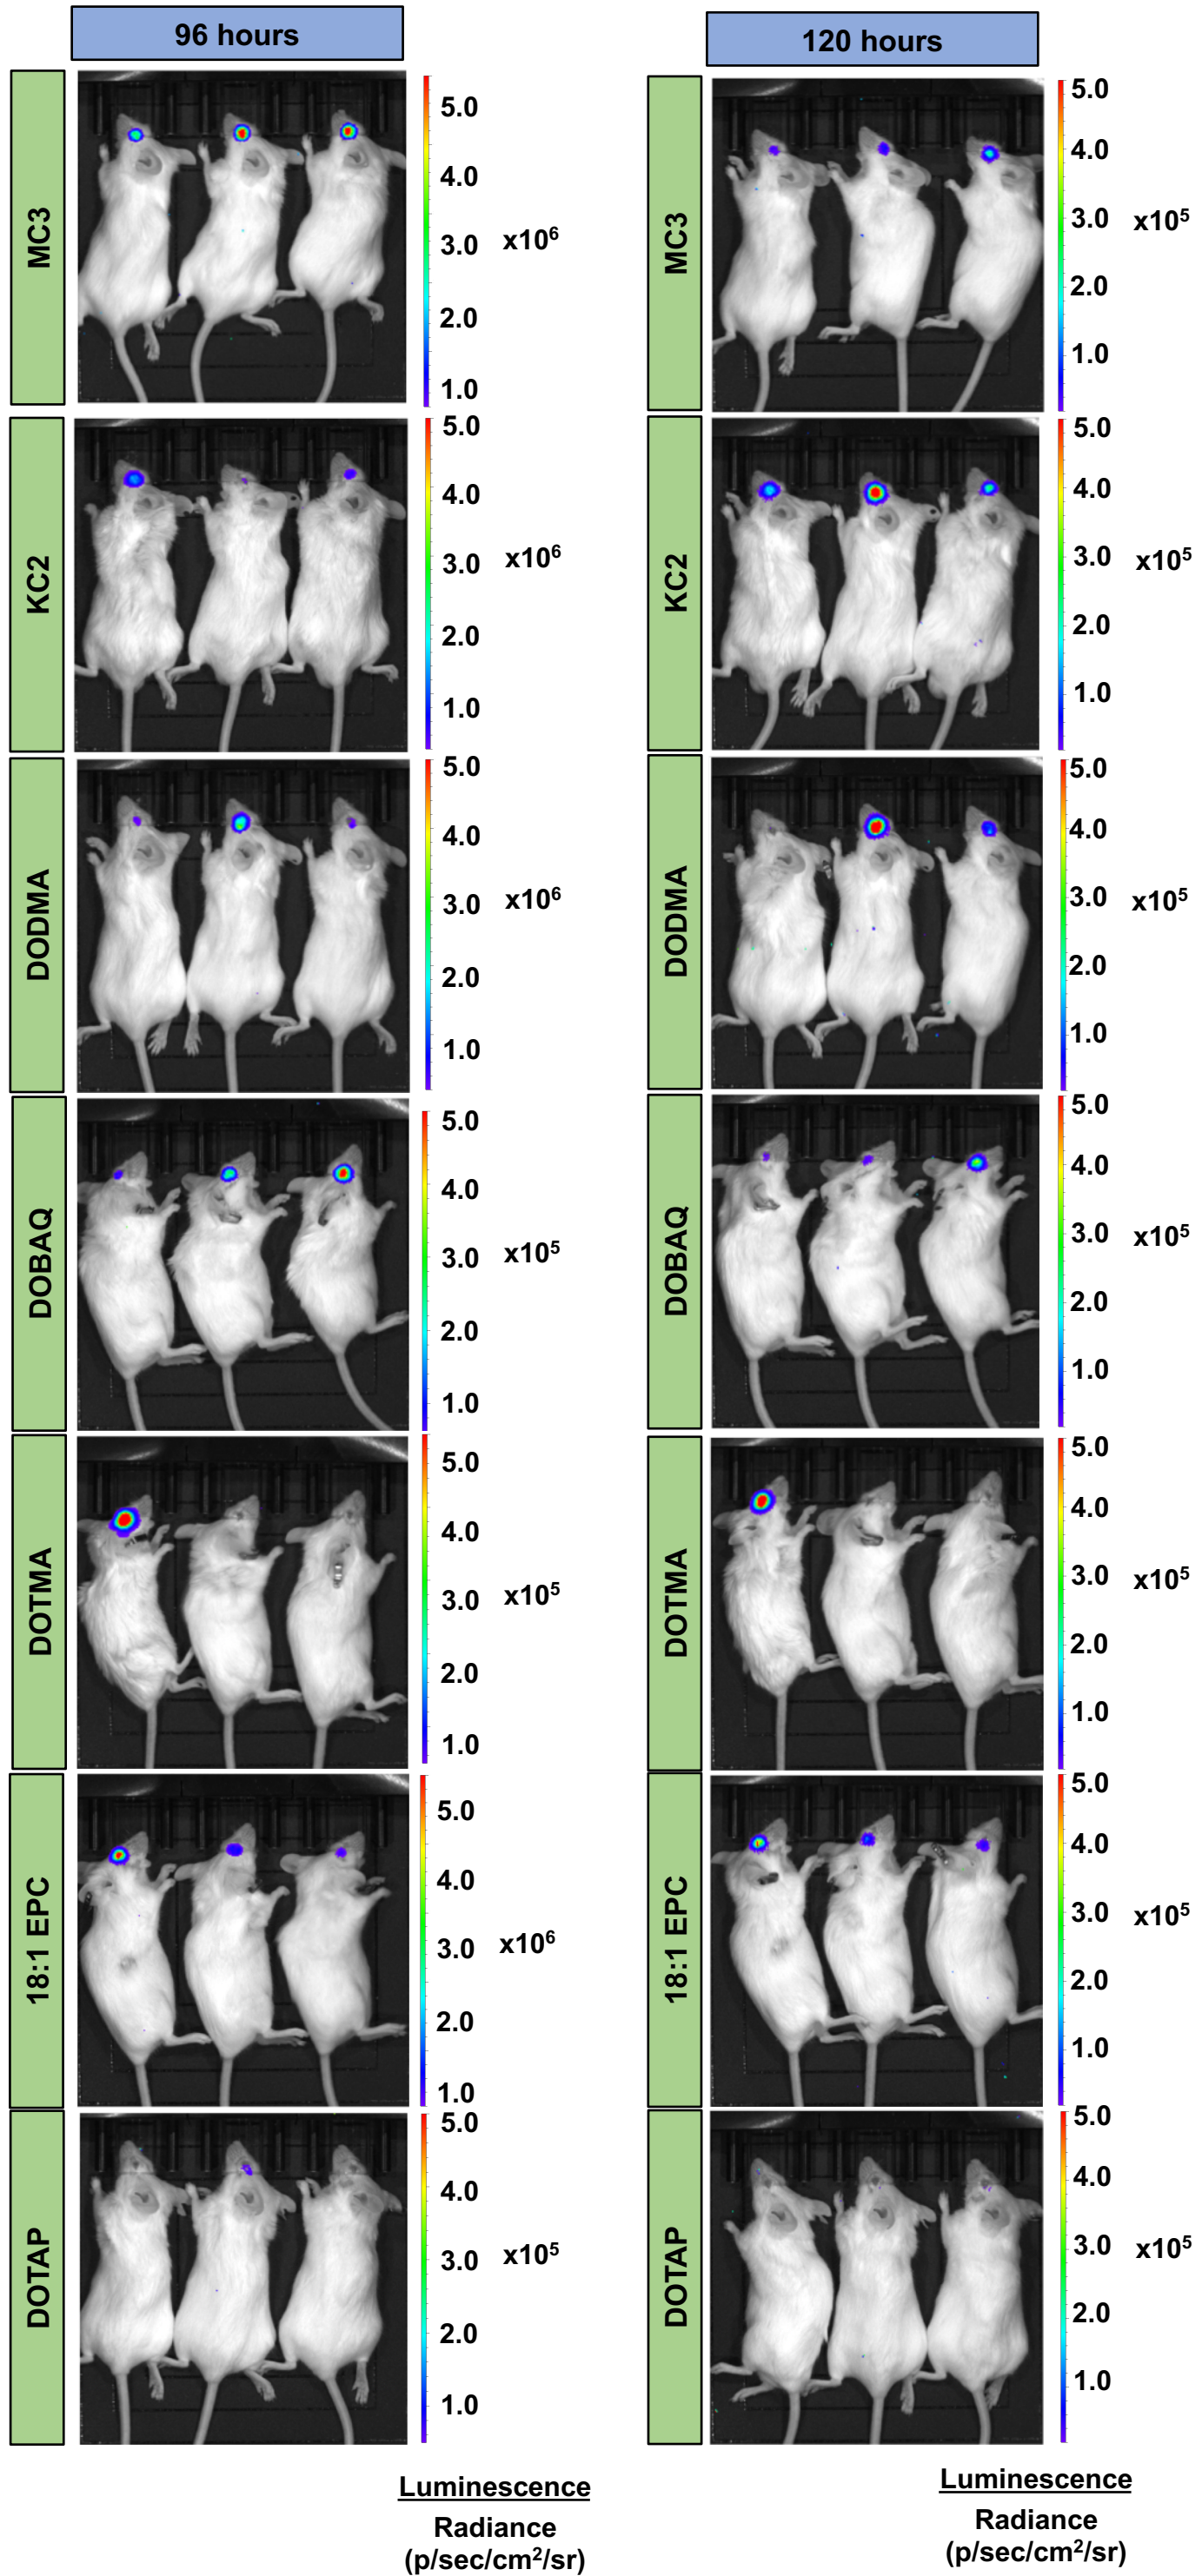

## Supplementary Figure 2

a.

| Time (h) | Group I |         |         |         |         |         | Group II |         |         |         |          |         |         |         |
|----------|---------|---------|---------|---------|---------|---------|----------|---------|---------|---------|----------|---------|---------|---------|
|          | MC3     |         | KC2     |         | DODMA   |         | DOBAQ    |         | DOTMA   |         | 18:1 EPC |         | DOTAP   |         |
|          | Mean    | SEM     | Mean    | SEM     | Mean    | SEM     | Mean     | SEM     | Mean    | SEM     | Mean     | SEM     | Mean    | SEM     |
| 24       | 9.0E+07 | 5.5E+07 | 8.8E+07 | 2.0E+07 | 3.3E+07 | 2.4E+07 | 4.5E+06  | 3.6E+06 | 1.0E+06 | 2.5E+05 | 1.3E+06  | 3.8E+05 | 3.9E+05 | 1.9E+05 |
| 48       | 7.5E+06 | 3.4E+06 | 3.8E+07 | 9.0E+06 | 1.3E+07 | 6.6E+06 | 5.3E+06  | 4.2E+06 | 8.8E+05 | 6.4E+05 | 4.6E+06  | 1.4E+06 | 5.1E+05 | 2.0E+05 |
| 72       | 2.1E+06 | 1.3E+06 | 1.3E+07 | 6.6E+06 | 3.5E+06 | 2.3E+06 | 1.6E+06  | 8.3E+05 | 6.0E+06 | 5.9E+06 | 4.3E+06  | 1.6E+06 | 3.7E+05 | 1.7E+05 |
| 96       | 7.4E+05 | 3.2E+05 | 2.6E+06 | 1.6E+06 | 7.8E+05 | 5.7E+05 | 2.4E+05  | 1.4E+05 | 3.7E+06 | 3.6E+06 | 1.5E+06  | 9.4E+05 | 4.3E+04 | 0.0E+00 |
| 120      | 1.3E+05 | 4.7E+04 | 9.3E+05 | 4.1E+05 | 2.5E+05 | 2.1E+05 | 8.1E+04  | 6.0E+04 | 2.8E+06 | 2.8E+06 | 1.3E+05  | 6.1E+04 | 1.1E+04 | 2.5E+02 |

b.

| Comparison | MC3      |       | KC2   |        |        |          | DODMA  |       |       |          | DOBAQ |       |
|------------|----------|-------|-------|--------|--------|----------|--------|-------|-------|----------|-------|-------|
|            | 18:1 EPC | DOTAP | DODMA | DOBAQ  | DOTMA  | 18:1 EPC | DOTAP  | DOBAQ | DOTMA | 18:1 EPC | DOTAP | DOTAP |
| 24 hours   | 0.021    | 0.036 | 0.002 | <0.001 | <0.001 | <0.001   | <0.001 | 0.043 | 0.016 | 0.003    | 0.009 | 0.041 |
| 48 hours   | NS       | NS    | NS    | 0.03   | 0.01   | 0.008    | 0.009  | NS    | NS    | NS       | NS    | NS    |

**Supplementary Figure 3**

| Cationic Lipid    | Group I      |               |             | Group II      |               |              |             |
|-------------------|--------------|---------------|-------------|---------------|---------------|--------------|-------------|
|                   | MC3          | KC2           | DODMA       | DOBAQ         | DOTMA         | 18:1 EPC     | DOTAP       |
| Encapsulation (%) | 98.8         | 97.8          | 95.1        | 71.2          | 99.4          | 99.2         | 99.4        |
| Size (nm)         | 103.6 ± 31.9 | 229.4 ± 156.5 | 83.2 ± 30.0 | 236.9 ± 150.6 | 100.2 ± 83.27 | 94.3 ± 112.4 | 89.6 ± 56.4 |
| PDI               | 0.085        | 0.279         | 0.144       | 0.269         | 0.234         | 0.271        | 0.213       |

# Supplementary Figure 4

a.

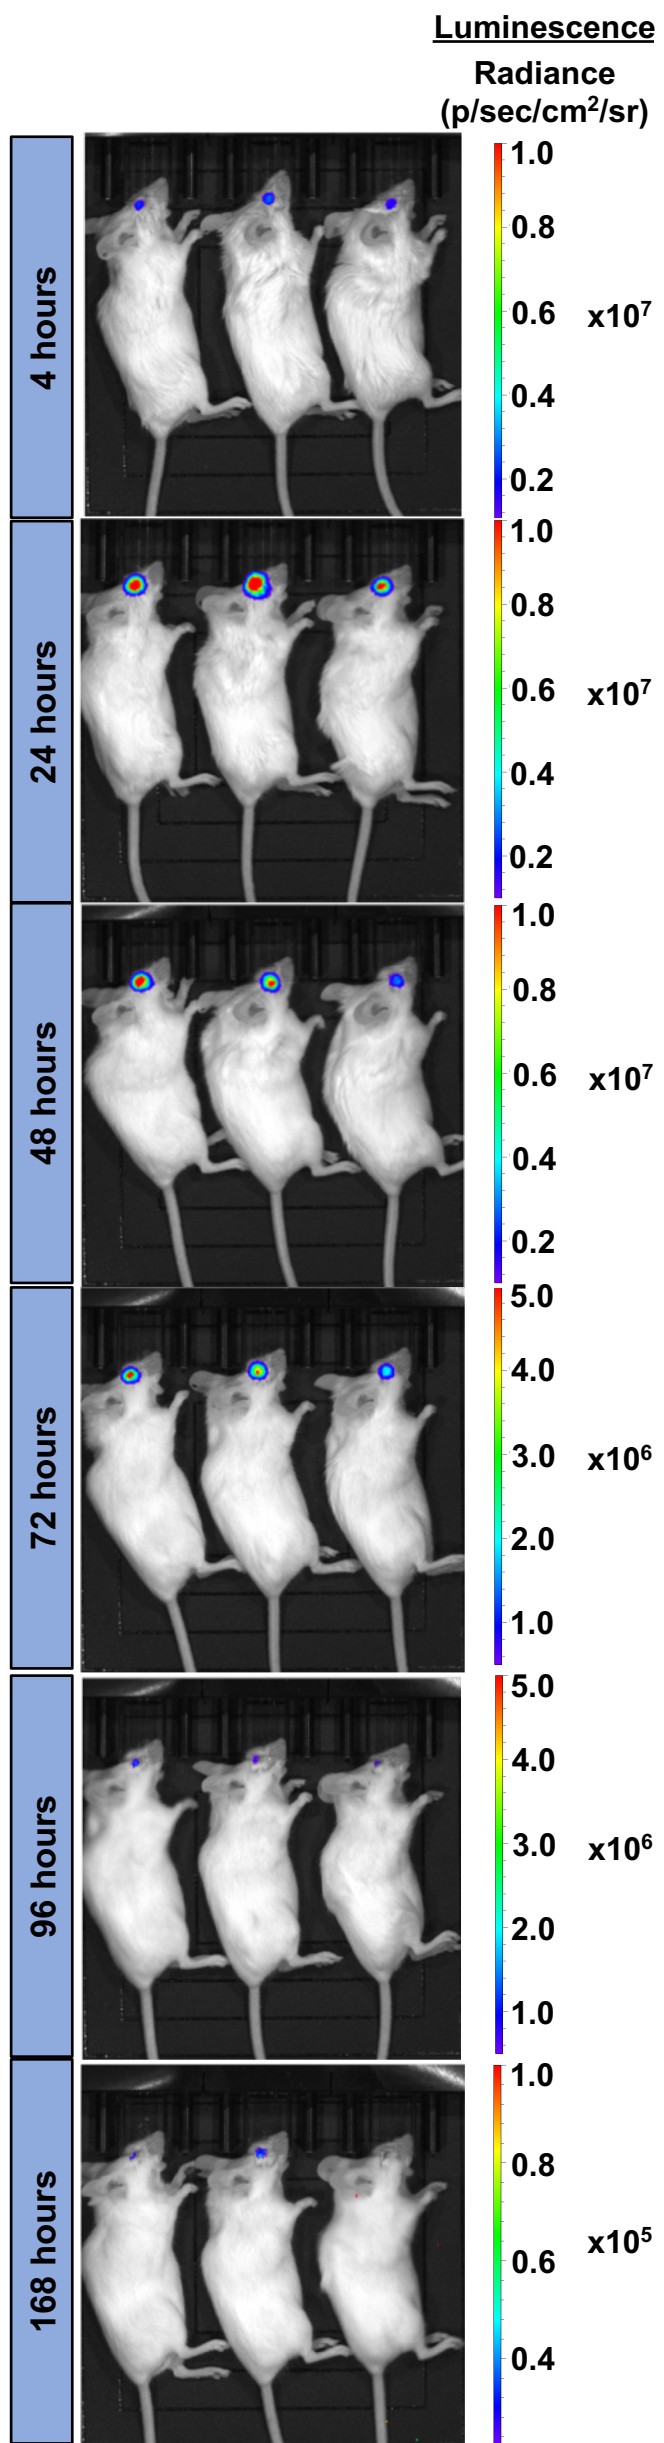

b.

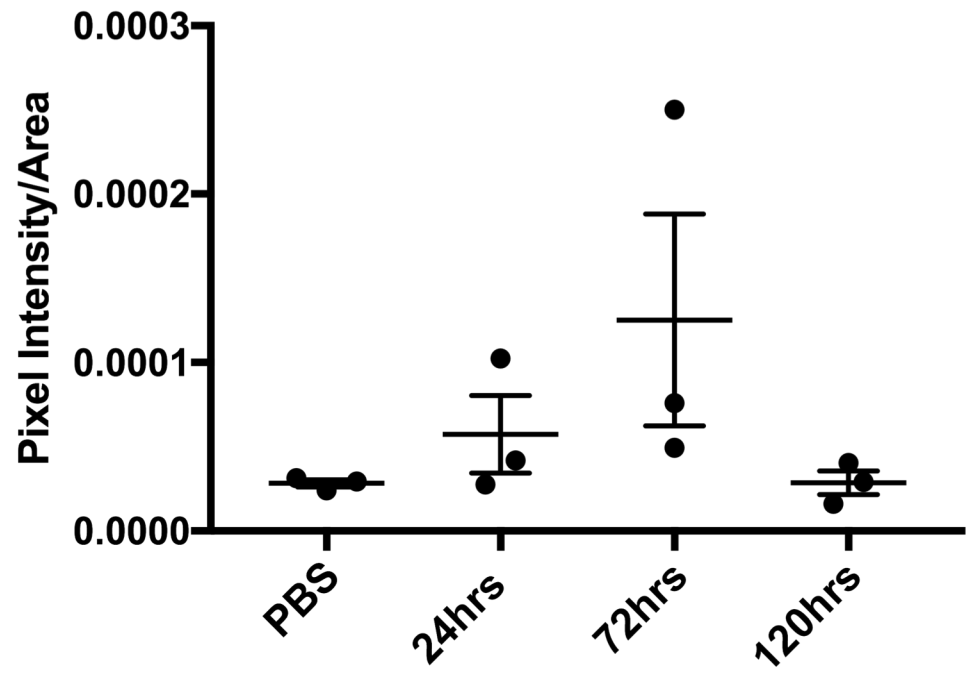

c.

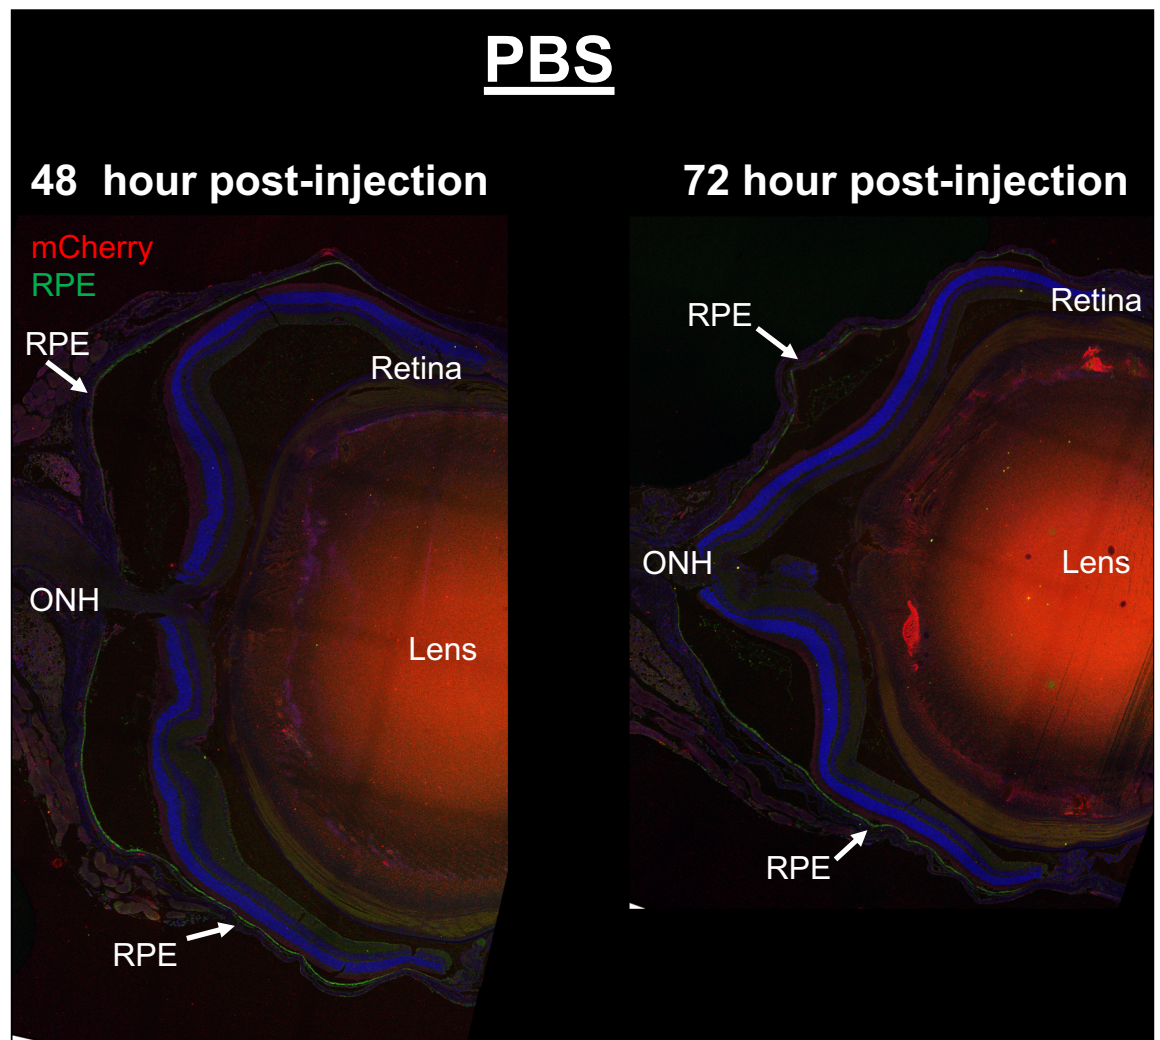

Supplement: NIHMS1527498-supplement-1.pdf [file NIHMS1527498-supplement-1.pdf]
